# Supplementary material
Source: publisher figshare collection journal article supplement (https://acs.figshare.com/ndownloader/files/5077402)
Supplement: Supplementary file 1 [file 5077402]

## Supporting Information

### Experimental methods

Methane hydrate was formed by pressurizing a glass bulb containing freshly powdered ice with 100%  $^{13}\text{C}$  enriched methane gas at about 4.8 MPa at 271-274 K for about two weeks. Excess methane gas was vacuum pumped from the glass bulb and the resulting methane hydrate in the glass bulb was sealed with a torch while cooling the sample with liquid nitrogen; sufficient hydrate melted to yield the equilibrium pressure of 1.4 MPa (Reference 11) while the sealed sample was stored in a freezer at 253 K until use. A fresh methane + water sample was prepared by condensing a quantity of 100%  $^{13}\text{C}$  enriched methane gas, sufficient to yield a final pressure of about 1 MPa, into a glass bulb containing water and sealing the bulb with a torch while cooling the sample with liquid nitrogen; the sample was stored at room temperature until use.

NMR spectra were recorded on a Chemagnetics CMX Infinity 400 NMR spectrometer operating at 100.6 MHz for  $^{13}\text{C}$  using a  $^1\text{H}$  decoupling field of 50 kHz unless indicated otherwise. The external chemical shift reference was the methyl carbon resonance of hexamethylbenzene, which was assigned a chemical shift of 17.36 ppm. Magic-angle spinning (MAS) was accomplished by placing the sealed glass bulb in a Chemagnetics 7.5 mm Pencil rotor.

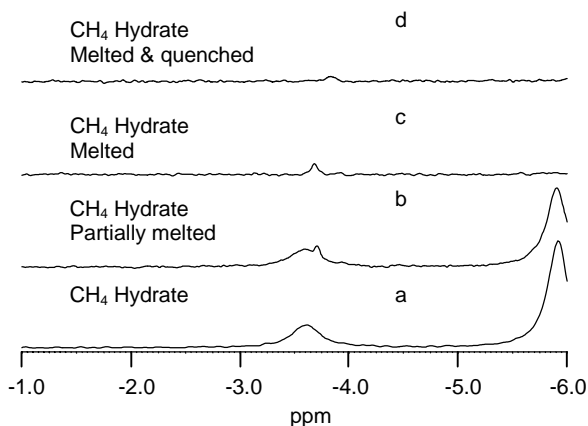

Figure 1S. 100.6 MHz  $^{13}\text{C}$  MAS NMR spectra of 100%  $^{13}\text{C}$  enriched  $\text{CH}_4$  hydrate in various states of decomposition. Same spectra as shown in Figure 1 but on scale expanded about the  $\text{CH}_4$  hydrate dodecahedral cage. a)  $\text{CH}_4$  hydrate at 243 K and 1.4 MPa, b) partially melted  $\text{CH}_4$  hydrate at 273 K and 2.6 MPa, c) completely melted  $\text{CH}_4$  hydrate at 275 K and 3.1 MPa, and d) completely melted and quenched  $\text{CH}_4$  hydrate at 253 K and 2.9 MPa.

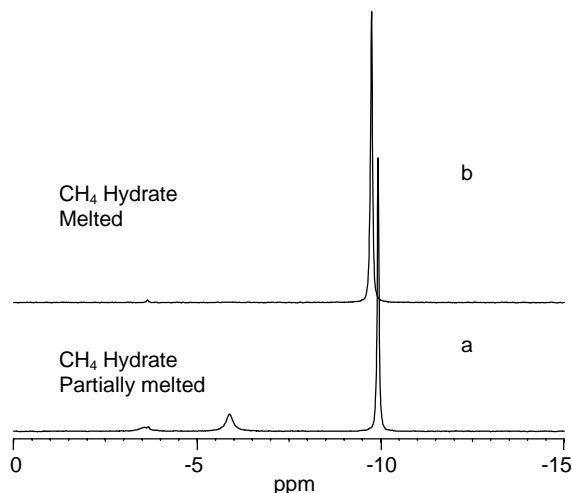

Figure 2S. 100.6 MHz  $^{13}\text{C}$  MAS NMR spectra of 100%  $^{13}\text{C}$  enriched  $\text{CH}_4$  hydrate in various states of decomposition. Spectra are those shown in Figures 1b and 1c but drawn on a scale to illustrate that the methane gas phase peak intensity dominates the spectrum.
